# Supplementary material
Source: PubMed Central journal article supplement (PMC7386308)

# Supplementary Figure 1

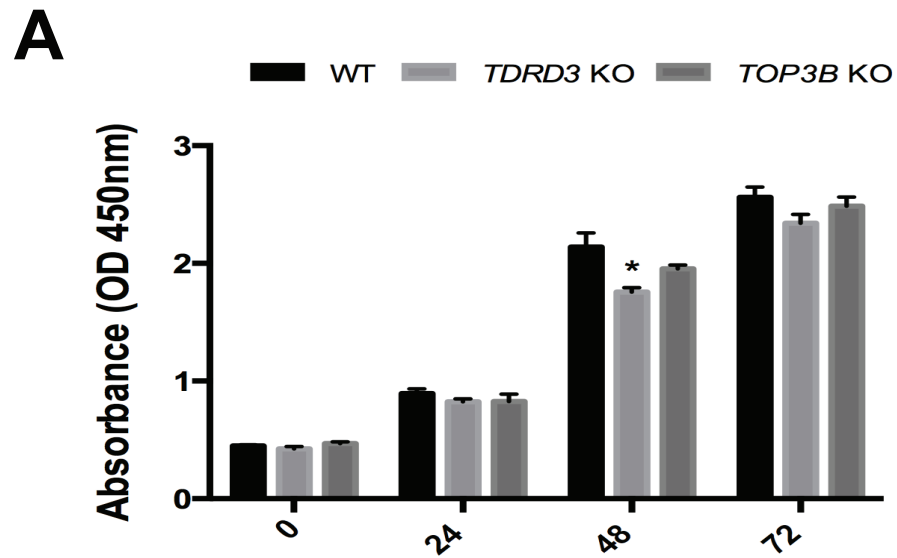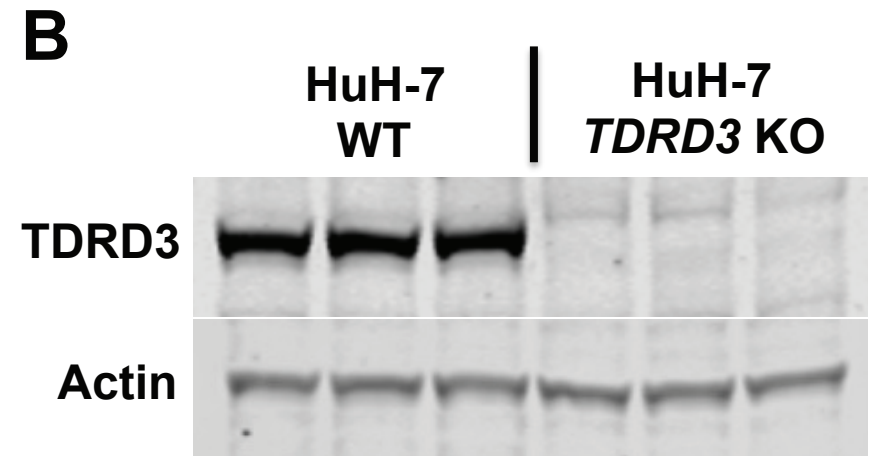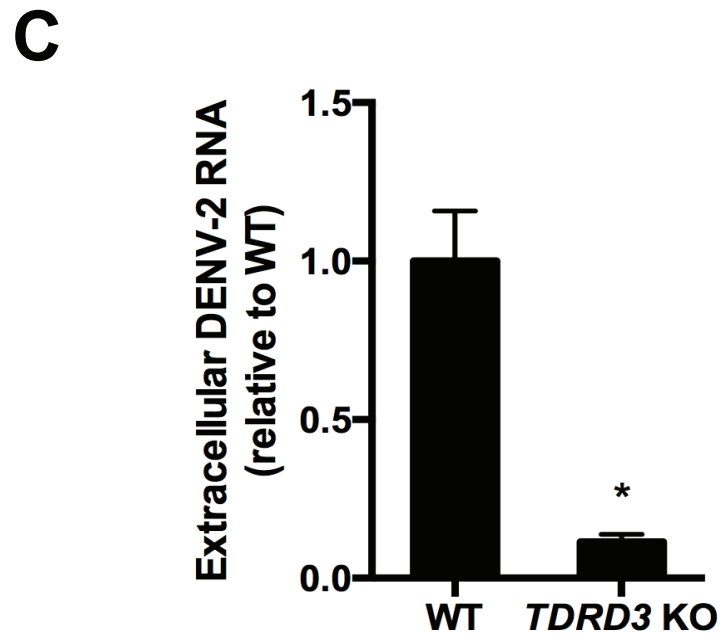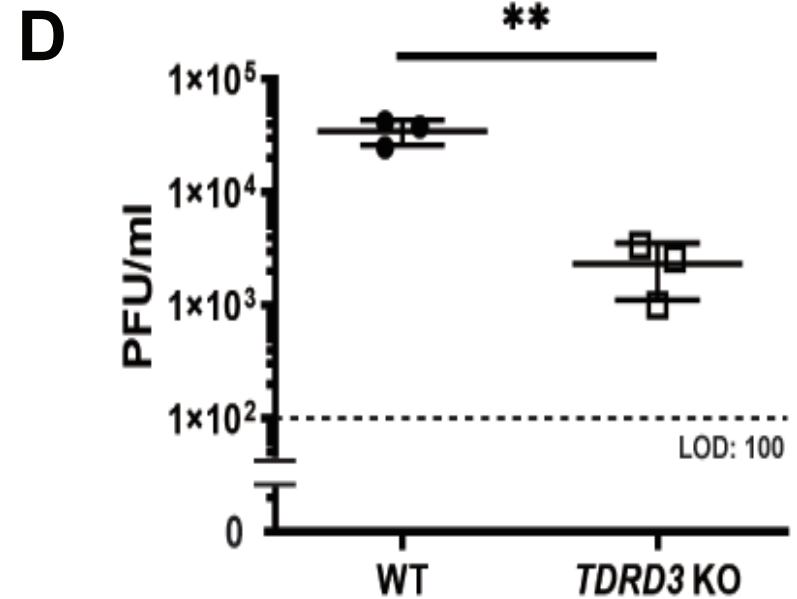

# Supplementary Figure 2

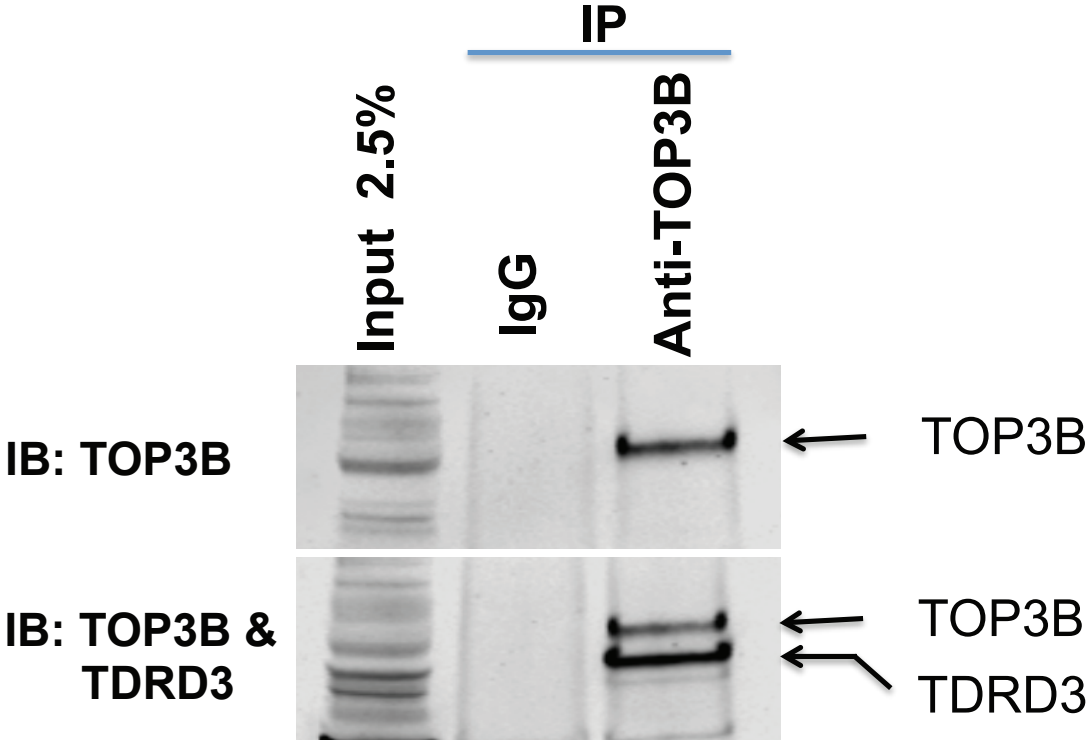

# Supplementary Figure 3

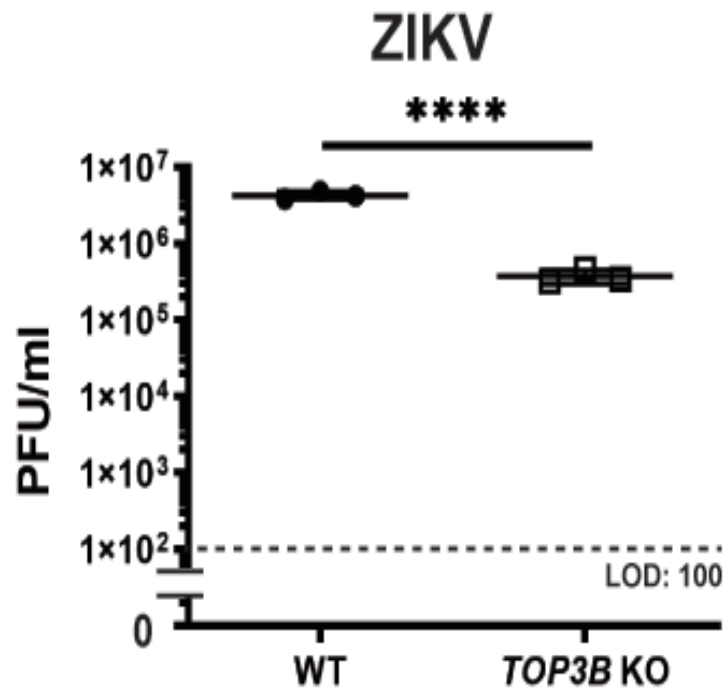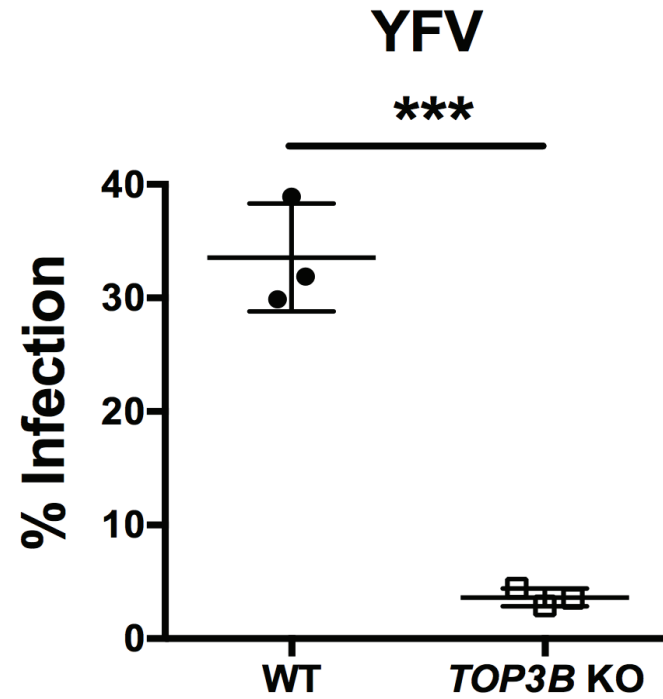

# Supplementary Figure 4

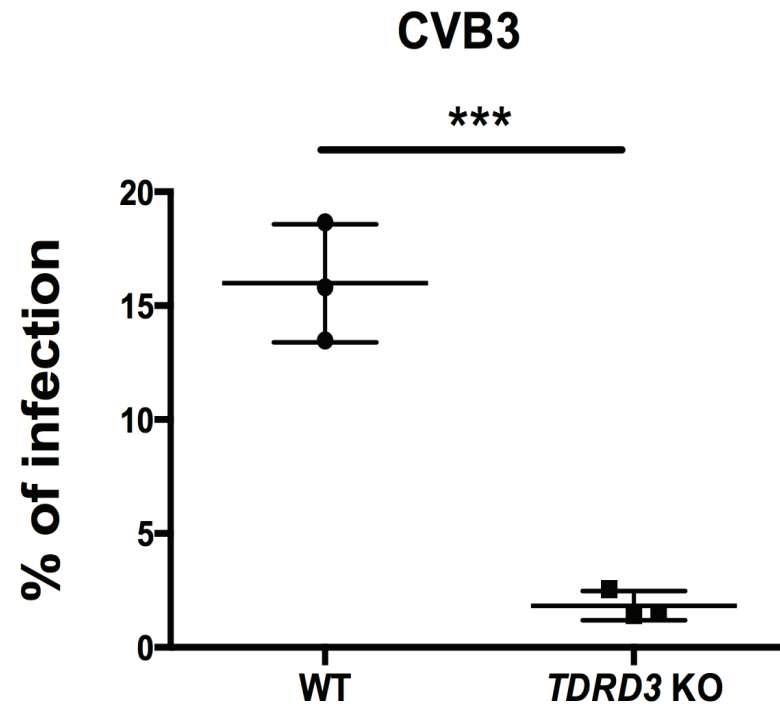

Supplement: mmc1.pdf [file mmc1.pdf]
